# Supplementary material for: Direct comparison of target-reactivity and cross-reactivity induced by CAR- and BiTE-redirected T cells for the development of antibody-based T-cell therapy
Source: PubMed Central journal article supplement (PMC6746725; doi:10.1038/s41598-019-49834-2), 2019-09-16
Supplement: 41598_2019_49834_MOESM1_ESM.pdf [file 41598_2019_49834_MOESM1_ESM.pdf]

**Direct comparison of target-reactivity and cross-reactivity induced by CAR- and BiTE-redirected T cells for the development of antibody-based T-cell therapy**

Masaki Maruta<sup>1</sup>, \*Toshiki Ochi<sup>1,2</sup>, Kazushi Tanimoto<sup>1</sup>, Hiroaki Asai<sup>1</sup>, Takashi Saitou<sup>3</sup>, Hiroshi Fujiwara<sup>1</sup>, Takeshi Imamura<sup>3</sup>, Katsuto Takenaka<sup>1</sup>, Masaki Yasukawa<sup>2</sup>

<sup>1</sup>Department of Hematology, Clinical Immunology, and Infectious Diseases, Ehime University Graduate School of Medicine, Toon, Ehime, Japan 791-0295; <sup>2</sup>Division of Immune Regulation, Proteo-Science Center, Ehime University, Toon, Ehime, Japan 791-0295; <sup>3</sup>Department of Molecular Medicine for Pathogenesis, Ehime University Graduate School of Medicine, Toon, Ehime, Japan 791-0295.

\*Correspondence should be addressed to T.O.

**Contact Information**

Toshiki Ochi, MD, PhD

Department of Hematology, Clinical Immunology and Infectious Diseases,

Ehime University Graduate School of Medicine

Shitsukawa, Toon, Ehime 791-0295, Japan

Phone: +81-89-960-5296

Fax: +81-89-960-5299

E-mail: [ochi.toshiki.eg@ehime-u.ac.jp](mailto:ochi.toshiki.eg@ehime-u.ac.jp)

# Supplementary Figure S1

**a**

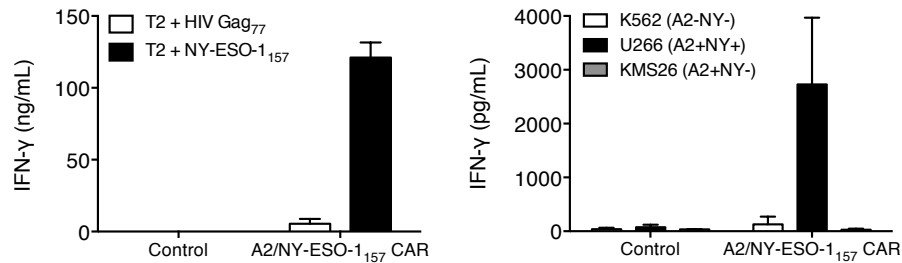

**b**

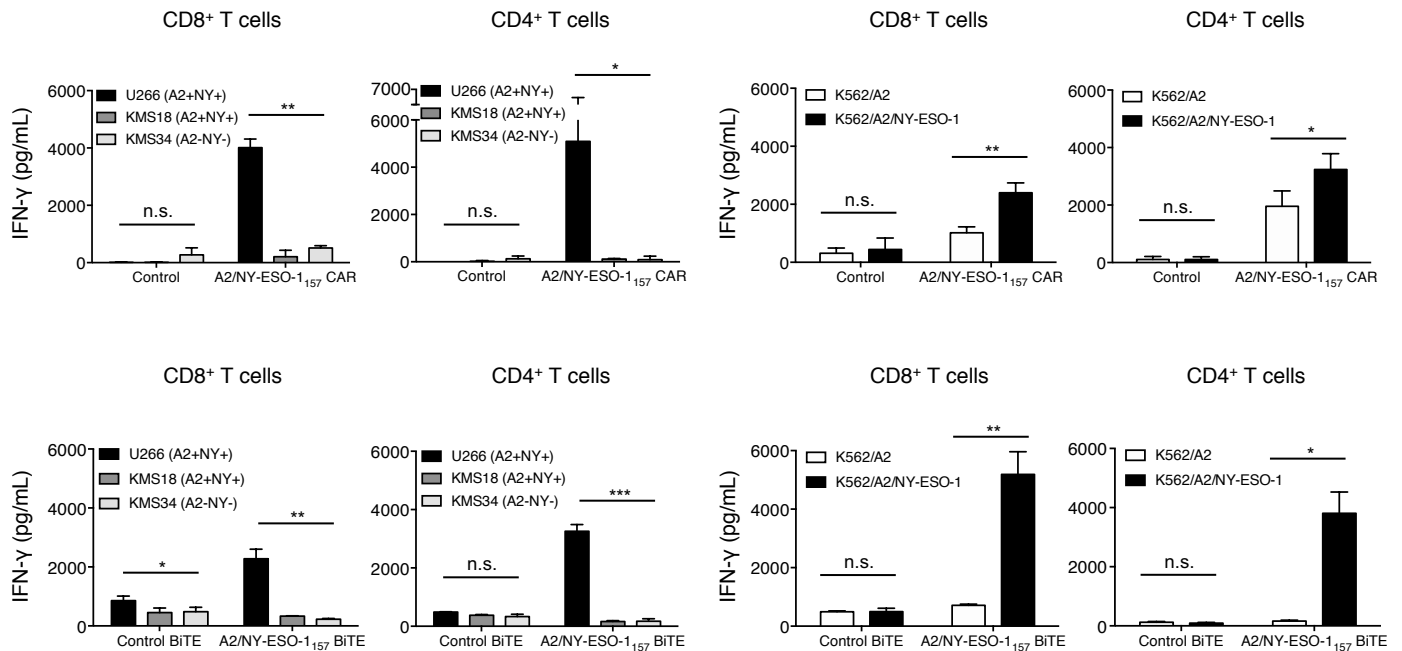

## Supplementary Figure S1: A2/NY-ESO-1<sub>157</sub>-specific CAR- and BiTE-redacted T cells recognize HLA-A2+NY-ESO-1<sup>+</sup> myeloma cells.

(a) A2/NY-ESO-1<sub>157</sub> CAR-redacted T cells established from donor 2 were incubated with the indicated target cells. The culture supernatants were collected and IFN- $\gamma$  concentration was measured by ELISA assays. The experiments were conducted in triplicate, and error bars demonstrate the SD. (b) A2/NY-ESO-1<sub>157</sub> CAR-redacted CD8<sup>+</sup> T cells and CD4<sup>+</sup> T cells were incubated with the indicated target cells (top). Peripheral blood CD8<sup>+</sup> T cells and CD4<sup>+</sup> T cells were also incubated with the same target cells in the presence of 5  $\mu$ g/mL NY-ESO-1<sub>157</sub> BiTE or control BiTE (bottom). IFN- $\gamma$  concentration in the culture supernatants was measured similarly to (a). The experiments were conducted in triplicate, and representative data obtained from donor 1 are displayed. Error bars depict the SD. \*, P<0.05; \*\*, P<0.01; \*\*\*, P<0.001; n.s., not significant.

## Supplementary Figure S2

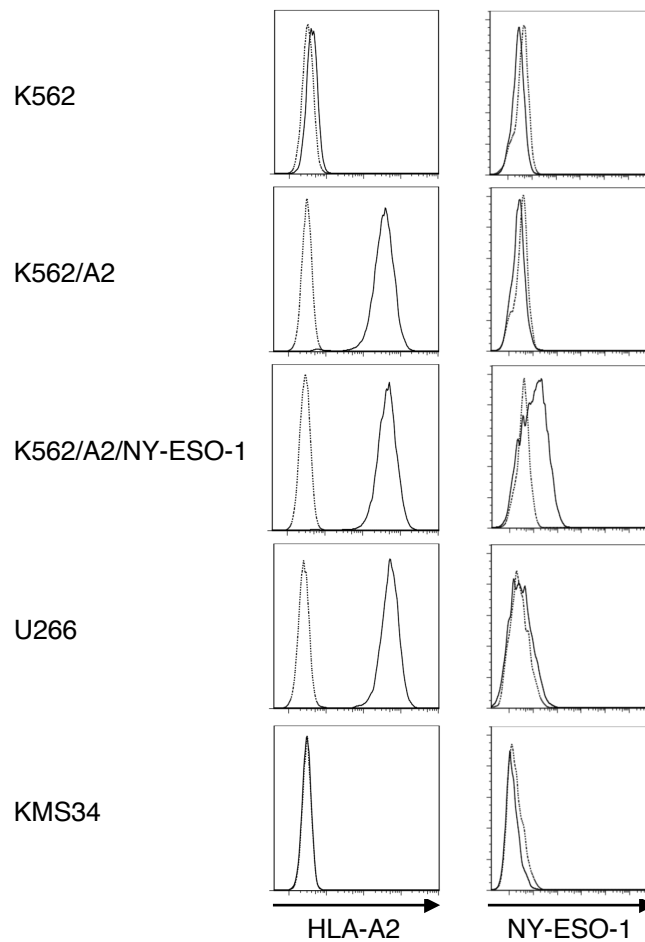

**Supplementary Figure S2: Expression of HLA-A2 and NY-ESO-1 in target cells.** HLA-A2 and NY-ESO-1 expression in 5 different cell lines used as the target cells in functional assays using CAR- and BiTE-redirected T cells was confirmed. These cell lines were stained with anti-HLA-A2 mAb (left). To stain NY-ESO-1, the cells were fixed and permeabilized, followed by staining with anti-NY-ESO-1 mAb (right). Dotted lines show the isotype control. The experiments were repeated 3 times and representative staining data are shown.

## Supplementary Figure S3

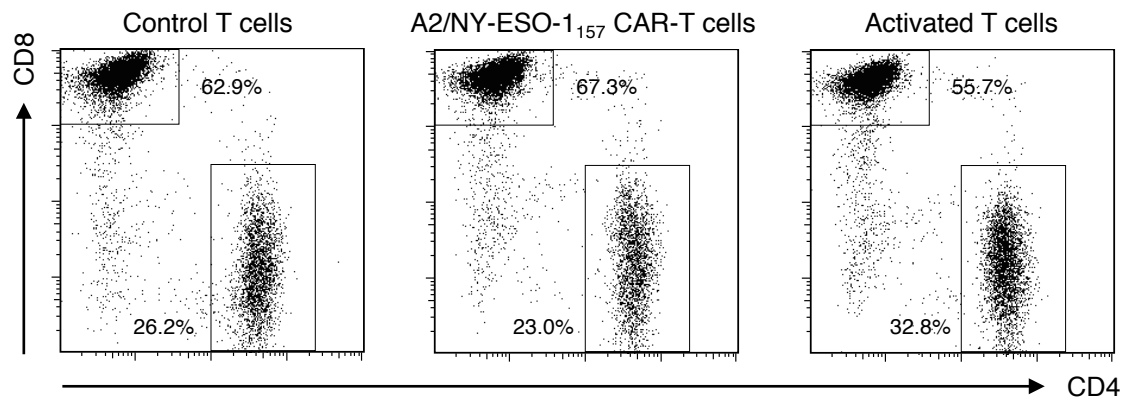

### **Supplementary Figure S3: CD4/CD8 ratios of CAR-T cells and similarly activated T cells used for *in vivo* experiments.**

Human peripheral blood T cells were stimulated as described in Materials and Methods. CD4/8 ratios obtained from control T cells (left), CAR-T cells (middle), and activated T cells (right) that were used for the *in vivo* side-by-side experiments shown in Fig. 6 are depicted.

Supplementary Figure S4

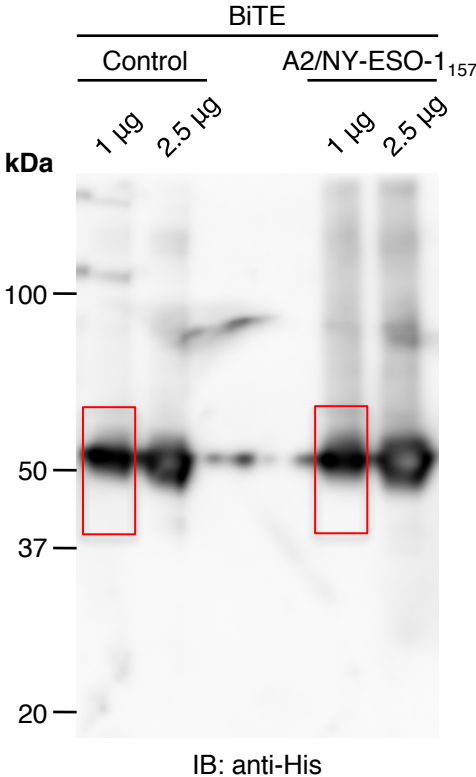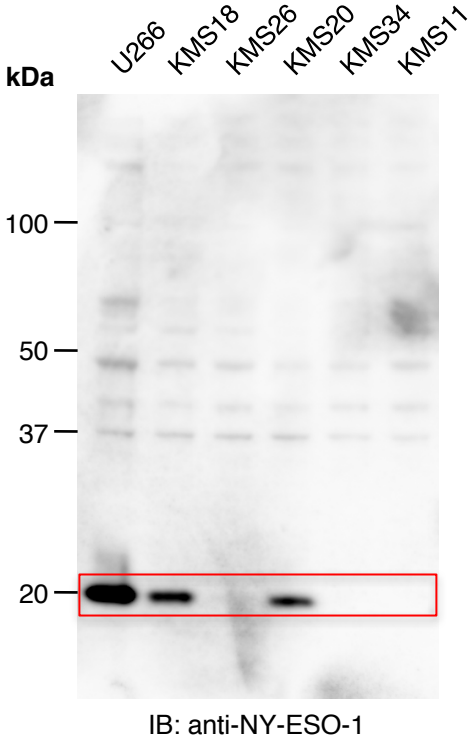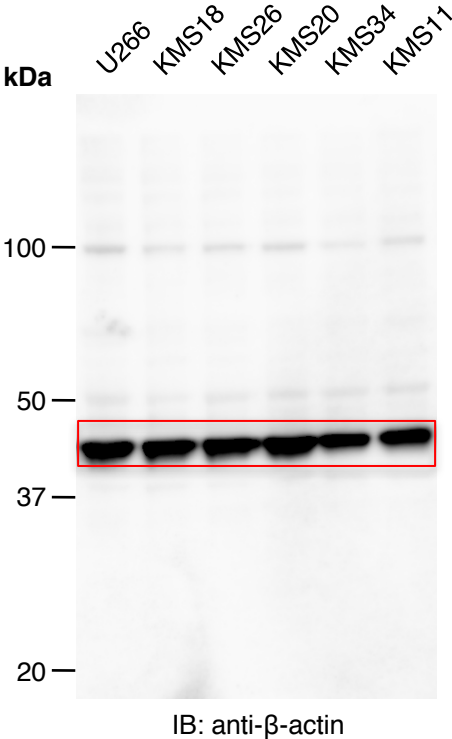

**Supplementary Figure S4: The full-length western blotting images.**  
The areas indicated as red rectangles are displayed in main Figures.  
(see Fig. 2a and Fig. 3).

## Supplementary Table S1

| <b>Protein</b>                                     | <b>Sequence</b> | <b>Binding affinity (nM)</b> |
|----------------------------------------------------|-----------------|------------------------------|
| NY-ESO-1 (wild type)                               | SLLMWITQC       | 666.69                       |
| NY-ESO-1 (heteroclitic)                            | SLLMWITQV       | 6.13                         |
| Probable E3 ubiquitin-protein ligase HERC1 (HERC1) | ILGMWIPEV       | 4.71                         |
| Solute carrier family 13 member 2 (SLC13A2)        | FLSMWISNT       | 28.28                        |
| Taste receptor type 2 member 8 (TA2R8)             | YLNMWITTC       | 222.60                       |
| Importin-13 (IPO13)                                | LLSMWIKKA       | 215.18                       |
| Solute carrier family 13 member 5 (SLC13A5)        | LLSMWISNT       | 348.31                       |
| Lysophospholipase-like protein 1 (LYPLAL1)         | GLRMWIKQV       | 1859.63                      |
| Ewing's tumor-associated antigen 1 (ETAA1)         | MLDMWIGET       | 147.04                       |
| Thioredoxin-related transmembrane protein 1 (TMX1) | QLSMWIRTC       | 6051.17                      |
| Mitochondrial inner membrane protein (COX18)       | QLPMWIFMS       | 1646.38                      |

**Supplementary Table S1: A list of peptides homologous to NY-ESO-1<sub>157</sub>.**

Based on the peptide sequence motif (xLxMWlxxx) revealed by alanine scanning assays, 9 different peptides homologous to NY-ESO-1<sub>157</sub> were synthesized. Binding affinity to HLA-A\*02:01 was predicted by netMHC4.0 (<http://www.cbs.dtu.dk/services/NetMHC/>).
